# Supplementary material for: Targeted Printing of Cells: Evaluation of ADA-PEG Bioinks for Drop on Demand Approaches
Source: MDPI journal article supplement (doi:10.3390/gels8040206), 2022-03-24
Supplement: s1 [file s1]

Article

# Targeted Printing of Cells: Evaluation of ADA-PEG Bioinks for Drop on Demand Approaches

Emine Karakaya <sup>1</sup>, Faina Bider <sup>1</sup>, Andreas Frank <sup>2</sup>, Jörg Teßmar <sup>3</sup>, Lisa Schöbel <sup>1</sup>, Leonard Forster <sup>3</sup>, Stefan Schröfer <sup>4</sup>, Hans-Werner Schmidt <sup>2</sup>, Dirk Wolfram Schubert <sup>4,5</sup>, Andreas Blaeser <sup>6,7</sup>, Aldo R. Boccaccini <sup>1</sup> and Rainer Detsch <sup>1,\*</sup>

\* Correspondence: rainer.detsch@fau.de; Tel.: +49-9131-85-69611

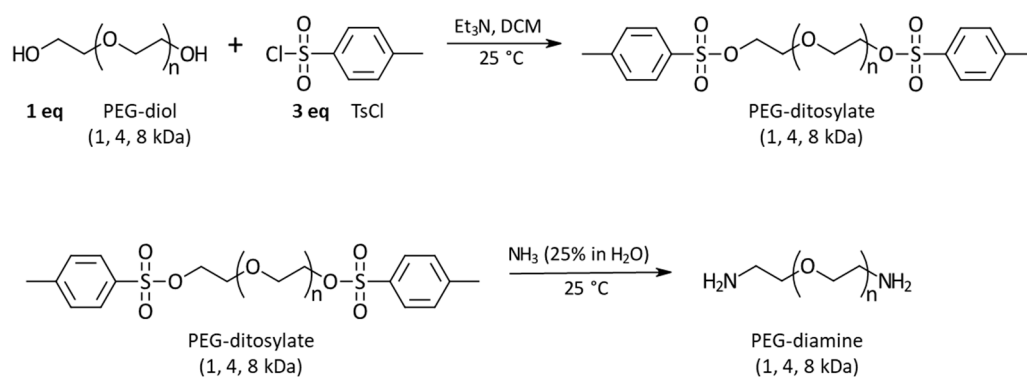

**Figure S1.** Two-step synthesis of PEG-diamine. First, PEG-diol was reacted to tosylate end groups with *p*-toluenesulfonyl chloride (TsCl) and converted in a second step to amino end groups to PEG-diamines using ammonia solution at RT.

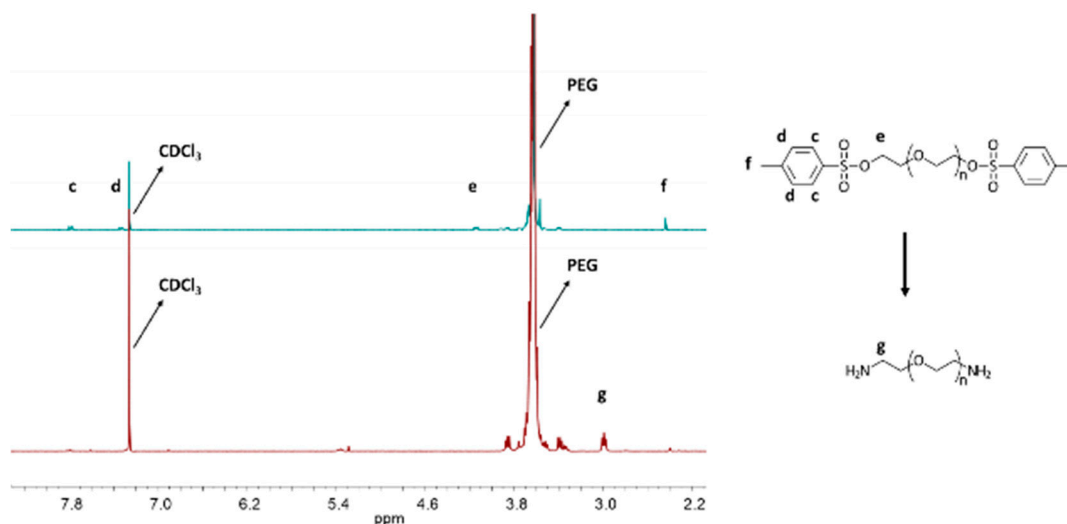

**Figure S2.** Comparison of the <sup>1</sup>H-NMR spectra of PEG-ditosylate 4 kDa and PEG-diamine 4 kDa.

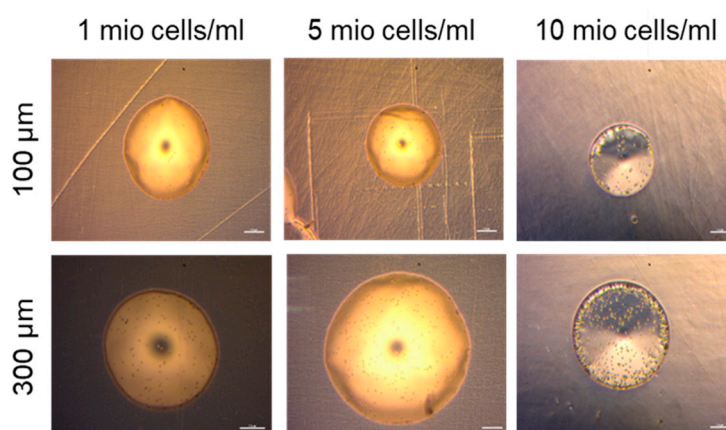

**Figure S3.** Exemplary light microscopy images of ejected droplets consisting of ADA-PEG(+) 1 kDa loaded with NIH/3T3 cells (1 - 10 mio·mL<sup>-1</sup>) and printed with two different nozzle diameters: 100 µm (top) and 300 µm (bottom).

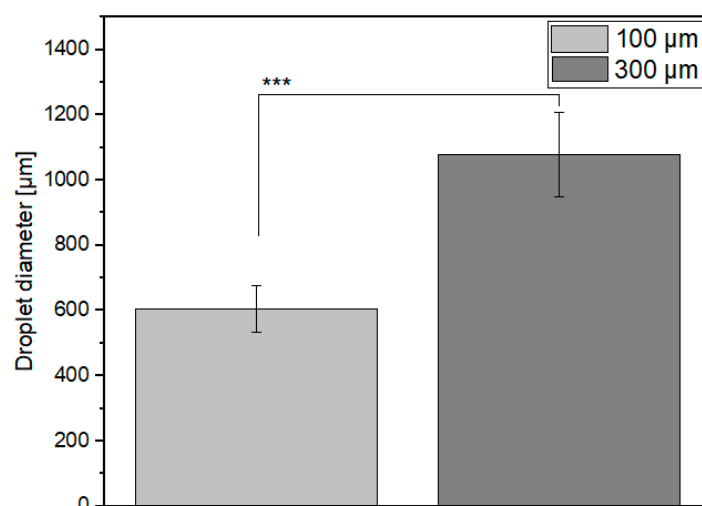

**Figure S4.** Diagram showing the average diameter of printed ADA-PEG(+) 1 kDa droplets using the 100 µm and the 300 µm nozzle, respectively. Average was calculated from 6 individual printing experiments with different initial cell concentrations (100.000 – 10 mio·mL<sup>-1</sup>). ns \*p < 0.05, \*\*p < 0.01, \*\*\*p < 0.001.

**Table S1.** List of covalently crosslinked (+) and uncrosslinked (-) ADA-PEG bioinks and information about their ADA and PEG-diamine or PEG-diol concentrations for the preparation of final bioinks after the combination of ADA and PEG hydrogels in a ratio of 1:1.

| Bioink label*    | Concentration of       | Concentration of               | Concentration of            |
|------------------|------------------------|--------------------------------|-----------------------------|
|                  | ADA<br>for 2 mL (w/v%) | PEG-diamine<br>for 2 mL (w/v%) | PEG-diol<br>for 2 mL (w/v%) |
| ADA-PEG(-) 1 kDa | 5.00                   | -                              | 1.00                        |
| ADA-PEG(-) 4 kDa | 5.00                   | -                              | 4.25                        |
| ADA-PEG(-) 8 kDa | 5.00                   | -                              | 8.65                        |
| ADA-PEG(+) 1 kDa | 5.00                   | 1.00                           | -                           |
| ADA-PEG(+) 4 kDa | 5.00                   | 4.25                           | -                           |
| ADA-PEG(+) 8 kDa | 5.00                   | 8.65                           | -                           |

\* Final volume: 4 mL.

**Table S2.** List of parameters used for the DoD printing of ADA-PEG(+) bioinks.

| Bioink label     | Printing pressure [kPa] | Printing speed [mm·s <sup>-1</sup> ] | Printing height [mm] | Open time [ms] | Cycle time [ms] |
|------------------|-------------------------|--------------------------------------|----------------------|----------------|-----------------|
| ADA-PEG(+) 1 kDa | 15 - 40.0               | 5.00                                 | 10.0                 | 1.00           | 50 - 1000       |
| ADA-PEG(+) 4 kDa | 15 - 40.0               | 5.00                                 | 10.0                 | 1.00           | 50 - 1000       |
| ADA-PEG(+) 8 kDa | 15 - 40.0               | 5.00                                 | 10.0                 | 1.00           | 50 - 1000       |
